# Supplementary material for: Real-World Treatment Patterns and Clinical Outcomes among Patients Receiving CDK4/6 Inhibitors for Metastatic Breast Cancer in a Canadian Setting Using AI-Extracted Data
Source: MDPI journal article supplement (doi:10.3390/curroncol31040161), 2024-04-09
Supplement: s1 [file s1]

**Supplementary Materials**

**Real-World Treatment Patterns and Clinical Outcomes Among Patients Receiving CDK4/6 Inhibitors for Metastatic Breast Cancer in a Canadian Setting Using AI-Extracted Data**

**Breast Cancer Research and Treatment**

**Table S1.** Clinical features extracted, definitions and data sources

| Feature (possible output)           | Feature definition                                                  | Data source          |
|-------------------------------------|---------------------------------------------------------------------|----------------------|
| Date of birth (YYYY-MM-DD)          | Patient’s date of birth as documented in structured format          | Structured EHR field |
| Sex (Male, Female)                  | Patient’s sex as documented in structured format                    | Structured EHR field |
| Date of death (YYYY-MM-DD)          | Patient’s date of death as documented in structured format          | Structured EHR field |
| Date of last follow-up (YYYY-MM-DD) | Patient’s date of last follow-up as documented in structured format | Structured EHR field |

| <b>Feature (possible output)</b>                      | <b>Feature definition</b>                                                                                                                                                     | <b>Data source</b>                                                          |
|-------------------------------------------------------|-------------------------------------------------------------------------------------------------------------------------------------------------------------------------------|-----------------------------------------------------------------------------|
| Date of ABC/MBC diagnosis (YYYY-MM-DD)                | First mention in patient records of positive diagnosis of advanced or metastatic breast cancer                                                                                | Unstructured patient clinical notes, pathology reports or radiology reports |
| ECOG at ABC/MBC diagnosis (0–5)                       | ECOG score reported closest to date of ABC/MBC diagnosis (up to 5 months pre/post-ABC/MBC diagnosis)                                                                          | Unstructured patient clinical notes                                         |
| Tumour grade at ABC/MBC diagnosis (1–3)               | Highest reported tumour grade closest to date of ABC/MBC diagnosis (up to 5 months pre/post-ABC/MBC diagnosis)                                                                | Unstructured patient clinical notes and pathology reports                   |
| Histology (Lobular, Ductal, DCIS, LCIS, Mixed, Other) | Breast cancer histology reported closest to date of ABC/MBC                                                                                                                   | Unstructured patient clinical notes and pathology reports                   |
| De novo/recurrent status (De novo, Recurrent)         | De novo: Metastases discovered in first 3 months of initial breast cancer diagnosis; Recurrent: Metastases discovered more than 3 months from initial breast cancer diagnosis | Unstructured patient clinical notes                                         |
| Metastatic sites (Bone, Brain, Lung, Liver)           | First positive mention of metastases from conclusions, summary, impression, interpretation or findings section of radiology report or clinical notes                          | Unstructured patient clinical notes and radiology reports                   |

| <b>Feature (possible output)</b>                                                                  | <b>Feature definition</b>                                                                                                                                                                                                                        | <b>Data source</b>                                        |
|---------------------------------------------------------------------------------------------------|--------------------------------------------------------------------------------------------------------------------------------------------------------------------------------------------------------------------------------------------------|-----------------------------------------------------------|
| HER2 status (Positive, Negative, Unknown, Indeterminate)                                          | HER2 status reported closest to date of ABC/MBC                                                                                                                                                                                                  | Unstructured patient clinical notes and pathology reports |
| ER status (Positive, Negative, Unknown, Indeterminate)                                            | ER status reported closest to date of ABC/MBC                                                                                                                                                                                                    | Unstructured patient clinical notes and pathology reports |
| PR status (Positive, Negative, Unknown, Indeterminate)                                            | PR status reported closest to date of ABC/MBC                                                                                                                                                                                                    | Unstructured patient clinical notes and pathology reports |
| Comorbidities (Atrial Fibrillation, Hypertension, Coronary Artery Disease, Diabetes, Stroke)      | Positive diagnosis of comorbidities of interest                                                                                                                                                                                                  | Unstructured patient clinical notes                       |
| Radiation treatment for ABC/MBC (Yes, No)                                                         | Any positive mention of radiation therapy of interest <sup>a</sup> after the date of ABC/MBC diagnosis                                                                                                                                           | Unstructured patient clinical notes                       |
| Systemic therapy and concomitant LHRH agonists (drug name, start date, end date, line of therapy) | Any systemic therapy or concomitant LHRH agonist administered after date of ABC/MBC and associated start and stop date. Lines of therapy were based on treatment start and stop dates, combining therapies into a single line when dates overlap | Unstructured/derived from patient clinical notes          |
| Premenopausal status (Yes, No)                                                                    | Premenopausal was defined as patients who were 50 years or younger and were on an LHRH agonist at any point.                                                                                                                                     | Derived                                                   |

| Feature (possible output) | Feature definition                                                                                                                           | Data source |
|---------------------------|----------------------------------------------------------------------------------------------------------------------------------------------|-------------|
| Age at ABC/MBC diagnosis  | Patient's age at ABC/MBC diagnosis; calculated using patient's date of birth and date of ABC/MBC diagnosis                                   | Derived     |
| TTNT1                     | Duration of 1L of therapy; calculating using systemic therapy start and stop dates <sup>b</sup>                                              | Derived     |
| TTC                       | Time from date of ABC/MBC to initiation chemotherapy; calculated using date of ABC/MBC diagnosis and start date of chemotherapy <sup>c</sup> | Derived     |
| OS                        | Overall survival; calculated using date of ABC/MBC diagnosis and date of death <sup>d</sup>                                                  | Derived     |

<sup>a</sup>Included WBRT, SRS, SBRT, PROP or Other; <sup>b</sup>TTNT was calculated by subtracting start date of 1L from the start date of 2L. Patients who did not go on to receive 2L were censored at their last known date of treatment; <sup>c</sup>TTC was calculated by subtracting start date of chemotherapy from the date of ABC/MBC diagnosis. Patients who didn't receive chemotherapy were censored at their date of last follow-up or death. Patients who experience death before starting their next treatment were also censored; <sup>d</sup>OS was calculated by subtracting the date of starting 1L from the date of death. Patients who did not die were censored at their last date of follow-up or study end date. ABC/MBC: Advanced/metastatic breast cancer; DCIS: Ductal carcinoma in situ; ECOG: Eastern Cooperative Oncology Group; ER: Estrogen receptor; HER2: Human Epidermal Receptor Growth Factor 2; LCIS: Lobular carcinoma in situ; LHRH: Luteinizing hormone-releasing hormone; OS: Overall survival; PR: Progesterone Receptor; PROP: Palliative radiation oncology program; SBRT: Stereotactic body radiation therapy; SRS: Stereotactic radiosurgery; TTC: Time from date of ABC/MBC to starting chemotherapy; TTNT1: Duration of treatment for 1L; WBRT: Whole brain radiation therapy.

**Table S2.** Evaluation of AI algorithms compared with manual chart review

| Feature   | Possible values                           | Precision | Recall | F1   | Overall accuracy |
|-----------|-------------------------------------------|-----------|--------|------|------------------|
| Histology | Lobular, Ductal, DCIS, LCIS, Mixed, Other | 1.00      | 1.00   | 1.00 | 1.00             |

| <b>Feature</b>                    | <b>Possible values</b>                                                       | <b>Precision</b> | <b>Recall</b> | <b>F1</b> | <b>Overall accuracy</b> |
|-----------------------------------|------------------------------------------------------------------------------|------------------|---------------|-----------|-------------------------|
| ECOG at ABC/MBC diagnosis         | 0–5                                                                          | 0.96             | 0.96          | 0.96      | 0.96                    |
| Metastatic sites                  | Brain, Bone, Liver, Lung                                                     | 0.97             | 0.98          | 0.97      | 0.97                    |
| Tumour grade at ABC/MBC diagnosis | 1–3                                                                          | 0.94             | 0.94          | 0.94      | 0.94                    |
| Comorbidities                     | Atrial Fibrillation, Hypertension, Coronary Artery Disease, Diabetes, Stroke | 0.94             | 0.94          | 0.94      | 0.94                    |
| HER2 receptor status              | Positive, Negative, Indeterminate, Unknown                                   | 0.88             | 0.88          | 0.88      | 0.94                    |
| ER receptor status                | Positive, Negative, Indeterminate, Unknown                                   | 1.00             | 1.00          | 1.00      | 1.00                    |
| PR receptor status                | Positive, Negative, Indeterminate, Unknown                                   | 1.00             | 1.00          | 1.00      | 1.00                    |
| De novo/recurrent status          | De novo, recurrent                                                           | 0.95             | 0.95          | 0.95      | 0.95                    |

ABC/MBC: Advanced/metastatic breast cancer; DCIS: Ductal carcinoma in situ; ECOG: Eastern Cooperative Oncology Group; ER: Estrogen receptor; HER2: Human Epidermal Receptor Growth Factor 2; LCIS: Lobular carcinoma in situ; PR: Progesterone Receptor.

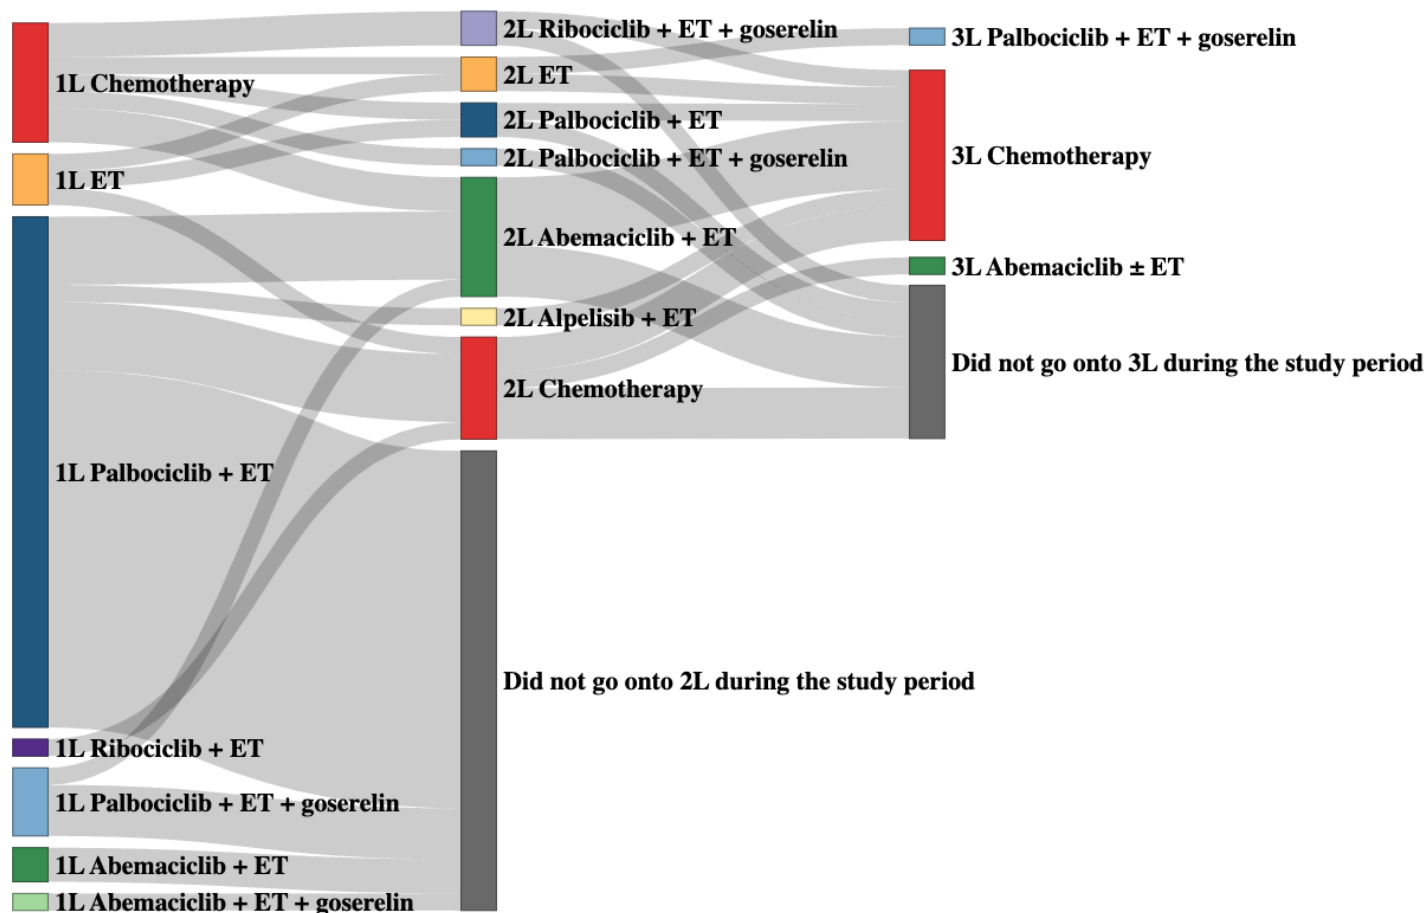

**Figure S1.** Sankey diagram of treatment patterns in all patients

Line of therapy is denoted by the number followed by the treatment regimen, with first line on the left and subsequent lines to the right.  
ET: Endocrine therapy.
